# Supplementary material for: Organoid Models of Colorectal Pathology: Do They Hold the Key to Personalized Medicine? A Systematic Review
Source: PubMed Central journal article supplement — Dis Colon Rectum. 2020 Aug 24;63(11):1559–69. doi: 10.1097/DCR.0000000000001806 (PMC7547902; doi:10.1097/dcr.0000000000001806), 2020-08-24
Supplement: dcr-63-1559-s001.pdf [file dcr-63-1559-s001.pdf]

## **Ovid-Medline and Ovid Embase**

1. Organoid/ or organoid.mp. (18364)
2. exp intestinal organoid/ (409)
3. tumor spheroid/ or spheroid.mp.(22112)
4. enteroid/ or enteroid.mp. (606)
5. colonoid/ or colonoid.mp. (157)
6. colon/ or colon.mp. (577121)
7. intestine/ or intestine.mp. (771974)
8. intestinal.mp. (763921)
9. 1 or 2 or 3 or 4 or 5 (40484)
10. 6 or 7 or 8 (1608933)
11. 9 and 10 (4608)
12. Limit 11 to yr="2006-2020" (4111)

## **Pubmed**

1. "organoids"[MeSH Terms] OR "organoids"[All Fields] OR "organoid"[All Fields] (13230)
2. "spheroid"[All Fields] OR "spheroidal"[All Fields] OR "spheroidally"[All Fields] OR "spheroidals"[All Fields] OR "spheroids"[All Fields] (15433)
3. "enteroid"[All Fields] OR "enteroids"[All Fields] (327)
4. "colonoid"[All Fields] OR "colonoids"[All Fields] (70)
5. 1 or 2 or 3 or 4 (28478)
6. "colon"[MeSH Terms] OR "colon"[All Fields] OR "colonic"[All Fields] OR "colons"[All Fields] OR "colon s"[All Fields] OR "colonal"[All Fields] OR "colonically"[All Fields] OR "colonitis"[All Fields]
7. "intestinalization"[All Fields] OR "intestinalized"[All Fields] OR "intestinally"[All Fields] OR "intestinals"[All Fields] OR "intestine s"[All Fields] OR "intestines"[MeSH Terms] OR "intestines"[All Fields] OR "intestinal"[All Fields] OR "intestine"[All Fields]
8. 6 or 7 (802787)
9. 5 and 8 (2491)
10. 2008/1/1:2020/1/15[Date - Publication]
11. 9 and 10 (1820)
